# Supplementary material for: Utilities for High-Throughput Analysis of B-Cell Clonal Lineages
Source: Hindawi journal article supplement (doi:10.1155/2015/323506), 2015-01-01
Supplement: f1 [file 323506.f1.pdf]

# Utilities For High-Throughput Analysis of B-Cell Clonal Lineages Supplementary Information

Graphical Output from Case Studies

VH4-34 lineage in the human tonsil

# Amino Acid Substitutions

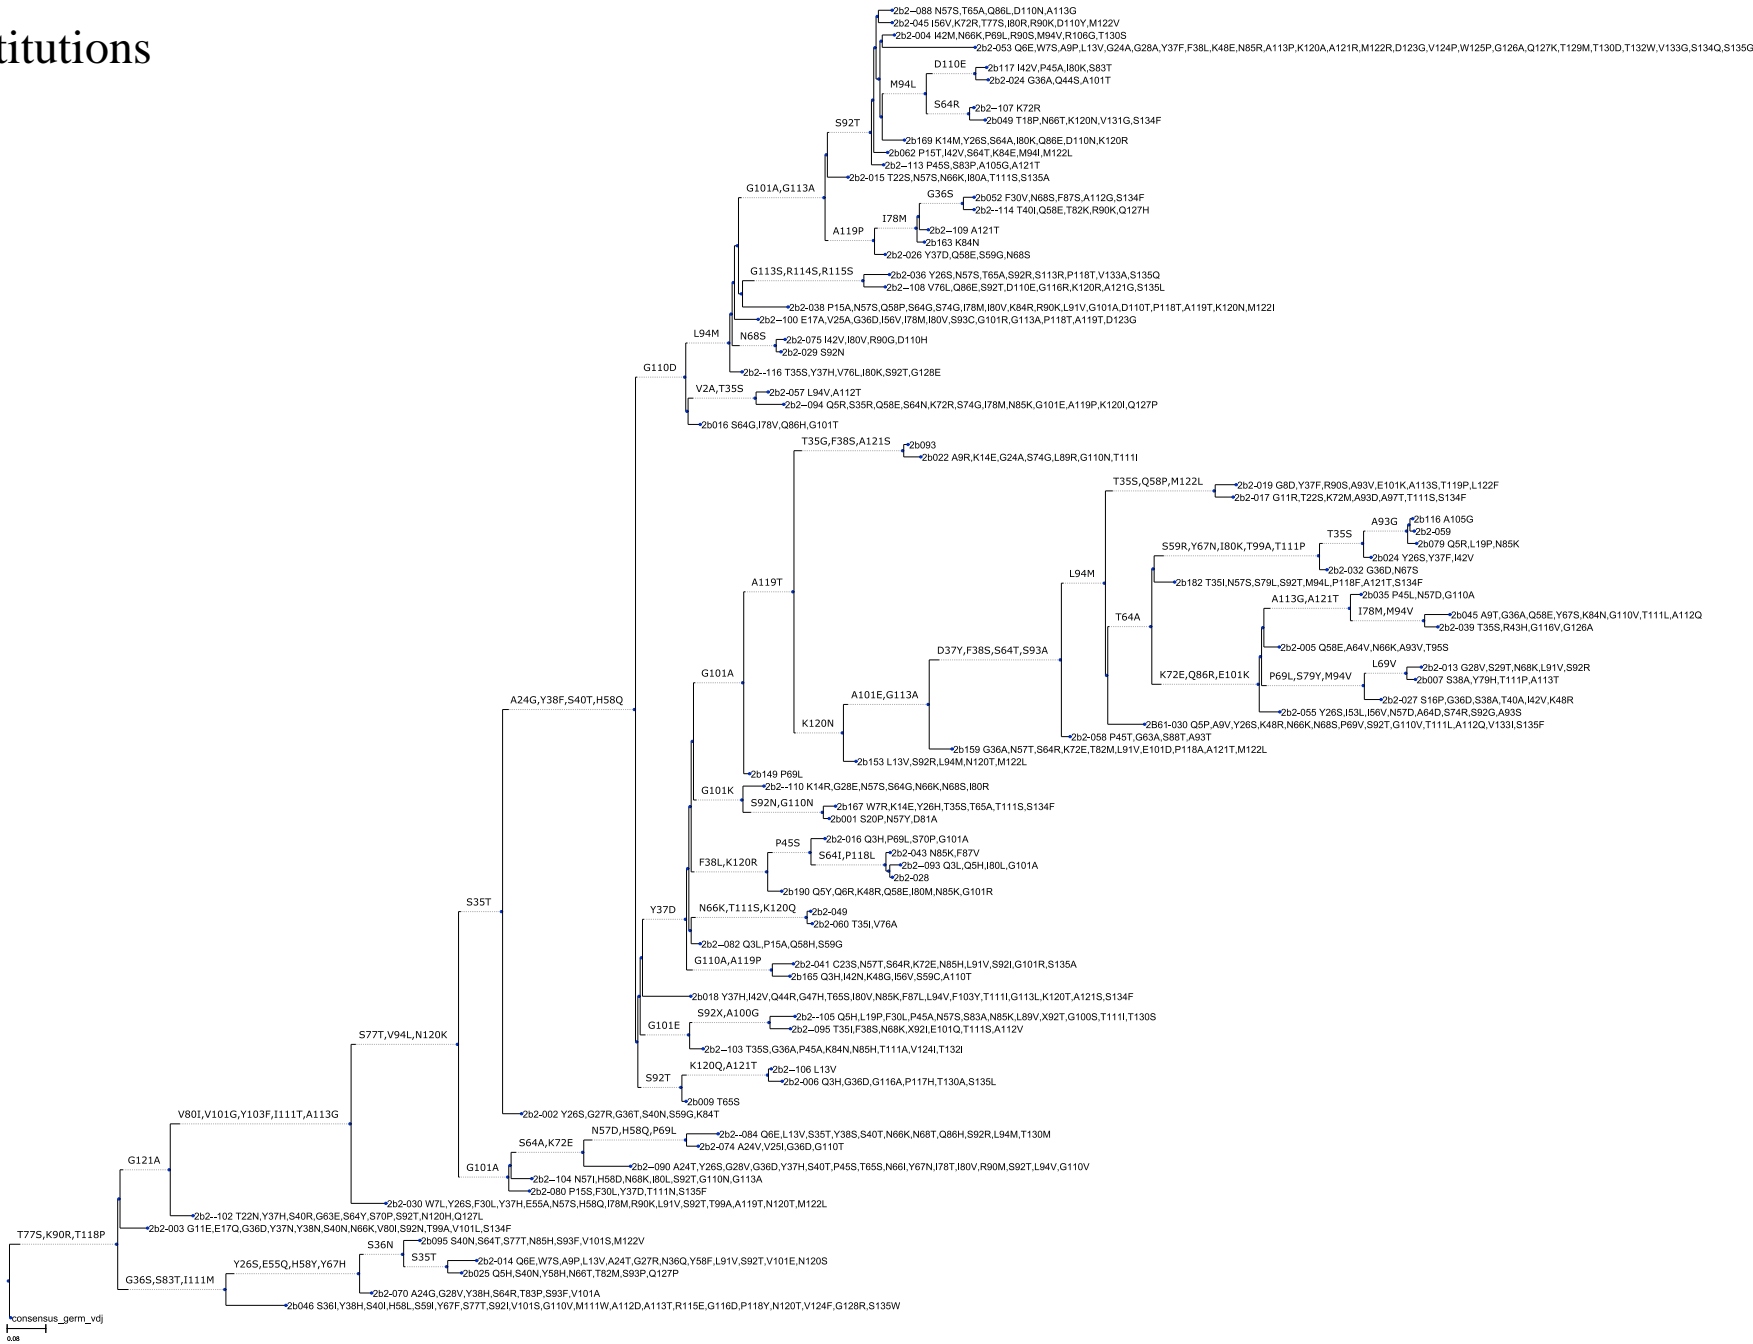



# Total Amino Acid Substitutions

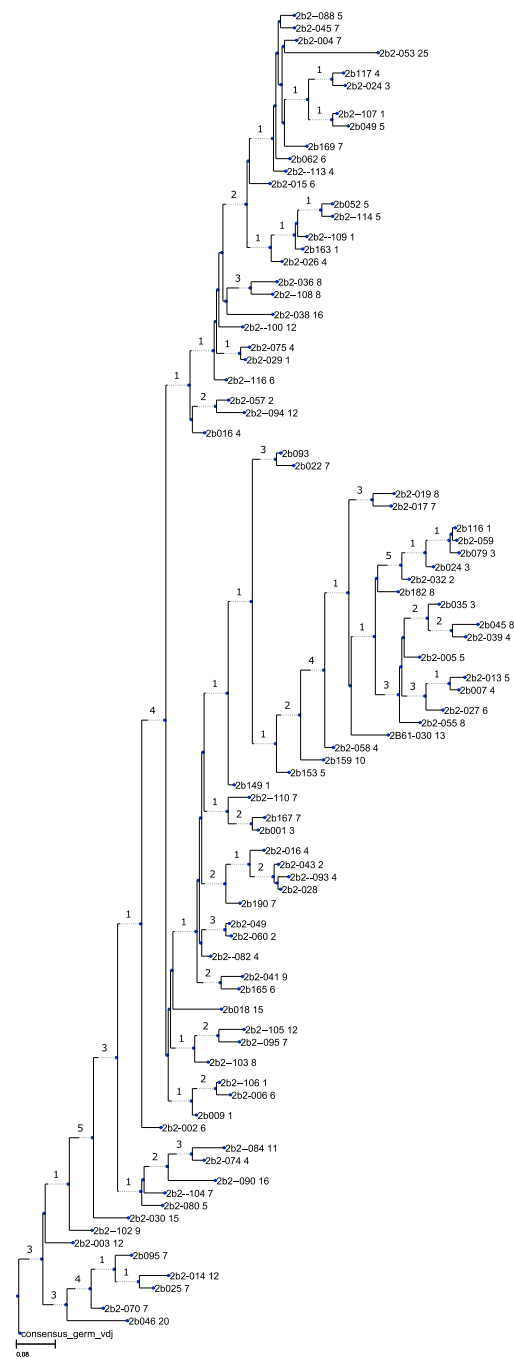



# CDR Change Analysis

|      | Conserved to Germline | Common to All  | Variations Across Samples                                                                                                                                              |
|------|-----------------------|----------------|------------------------------------------------------------------------------------------------------------------------------------------------------------------------|
| CDR1 |                       |                | 27:GR,28:AEGV,29:ST,30:FLV,35:GIRST,36:ADGINQST,37:DFHNY,38:AFHLNSY                                                                                                    |
| CDR2 |                       |                | 56:IV,57:DINSTY,58:DEFHLPQY,59:CGIRS,63:AEG,64:ADGINRSTVY,65:AST                                                                                                       |
| CDR3 |                       | 107G,108L,109S | 105:AG,106:GR,110:ADEGHNTVY,111:AILMNPSTW,112:ADGQTV,113:AGLPRST,114:RS,115:ERS,116:ADGRV,117:HP,118:AFLPTY,119:APT,120:AHIKNQRST,121:AGRST,122:FILMRV,123:DG,124:FIPV |

Heavy chain clonal family from a 2-week old zebrafish

# Amino Acid Substitutions

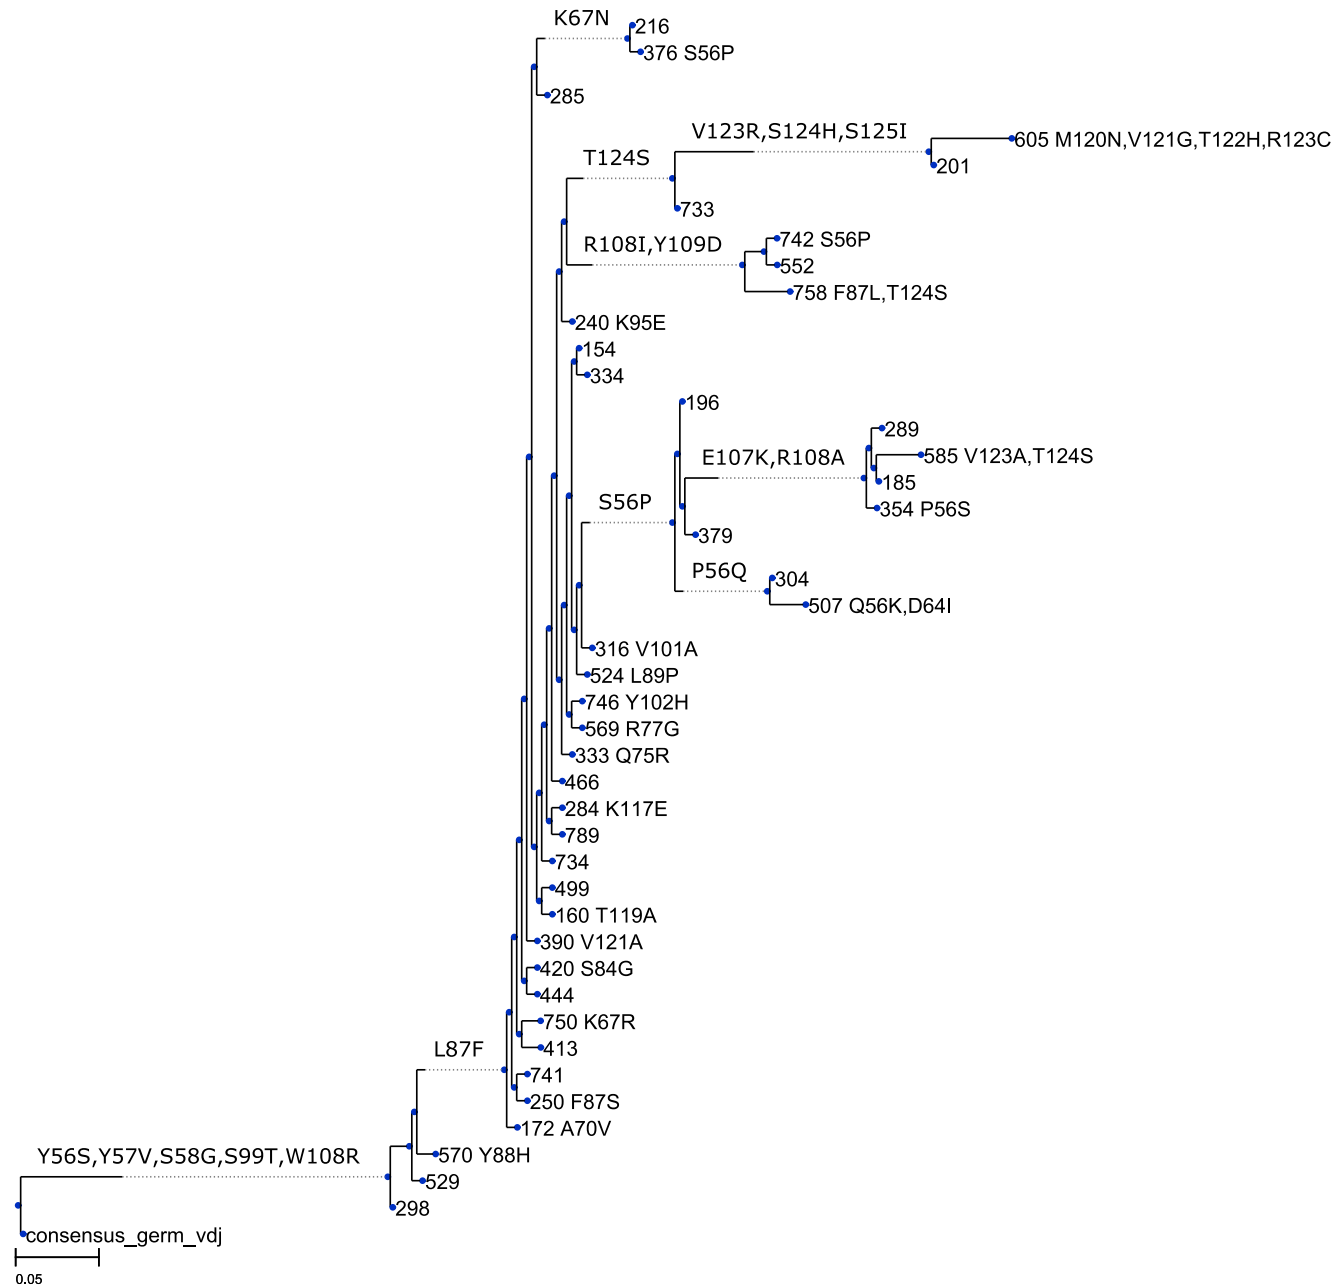

# Substitutions by Region

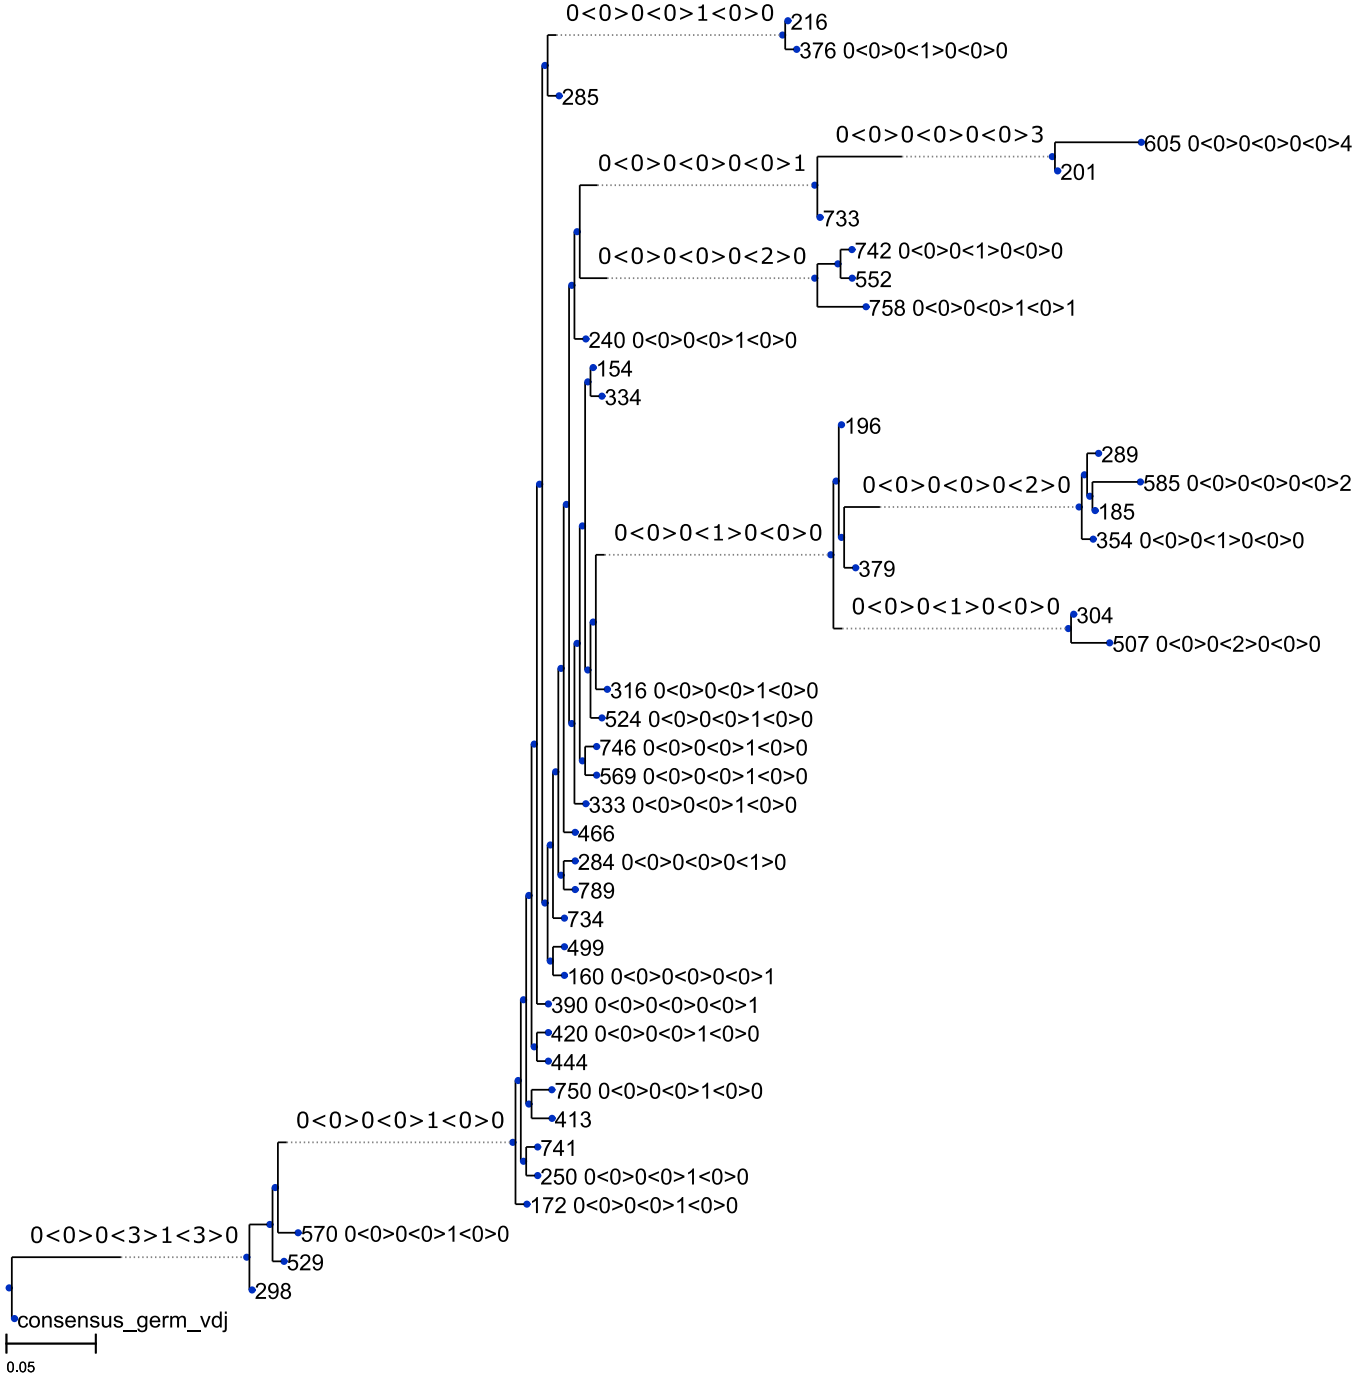

# Total Amino Acid Substitutions

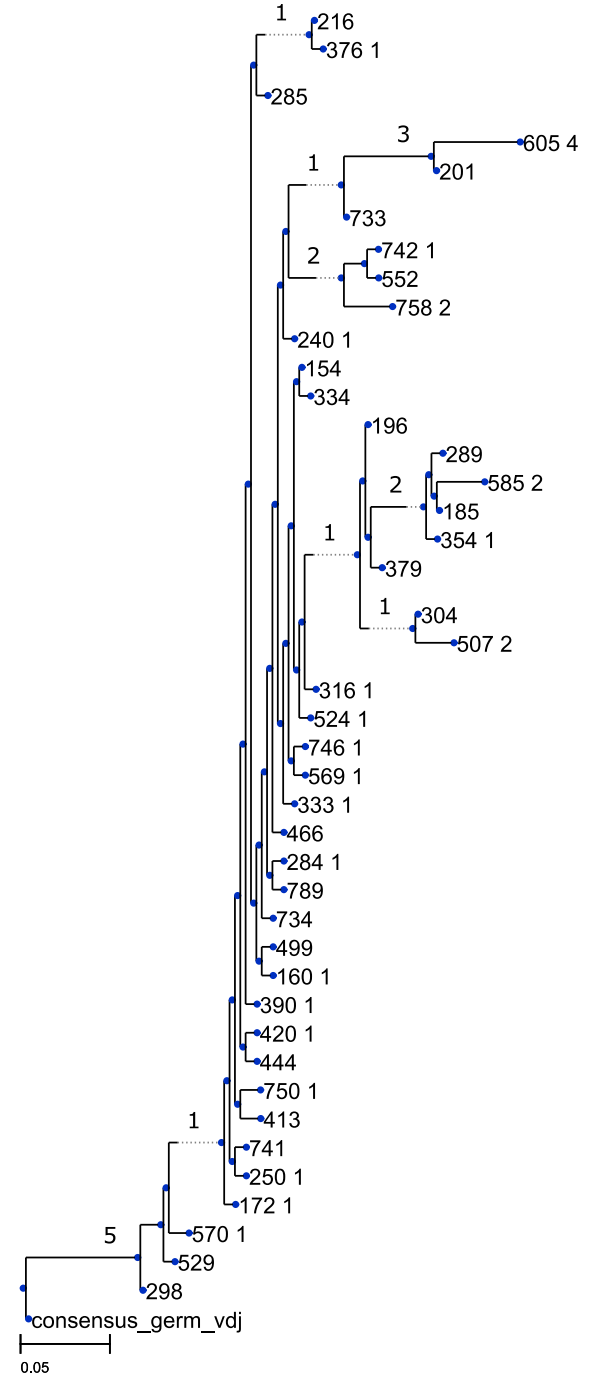

# Intermediate Node Names

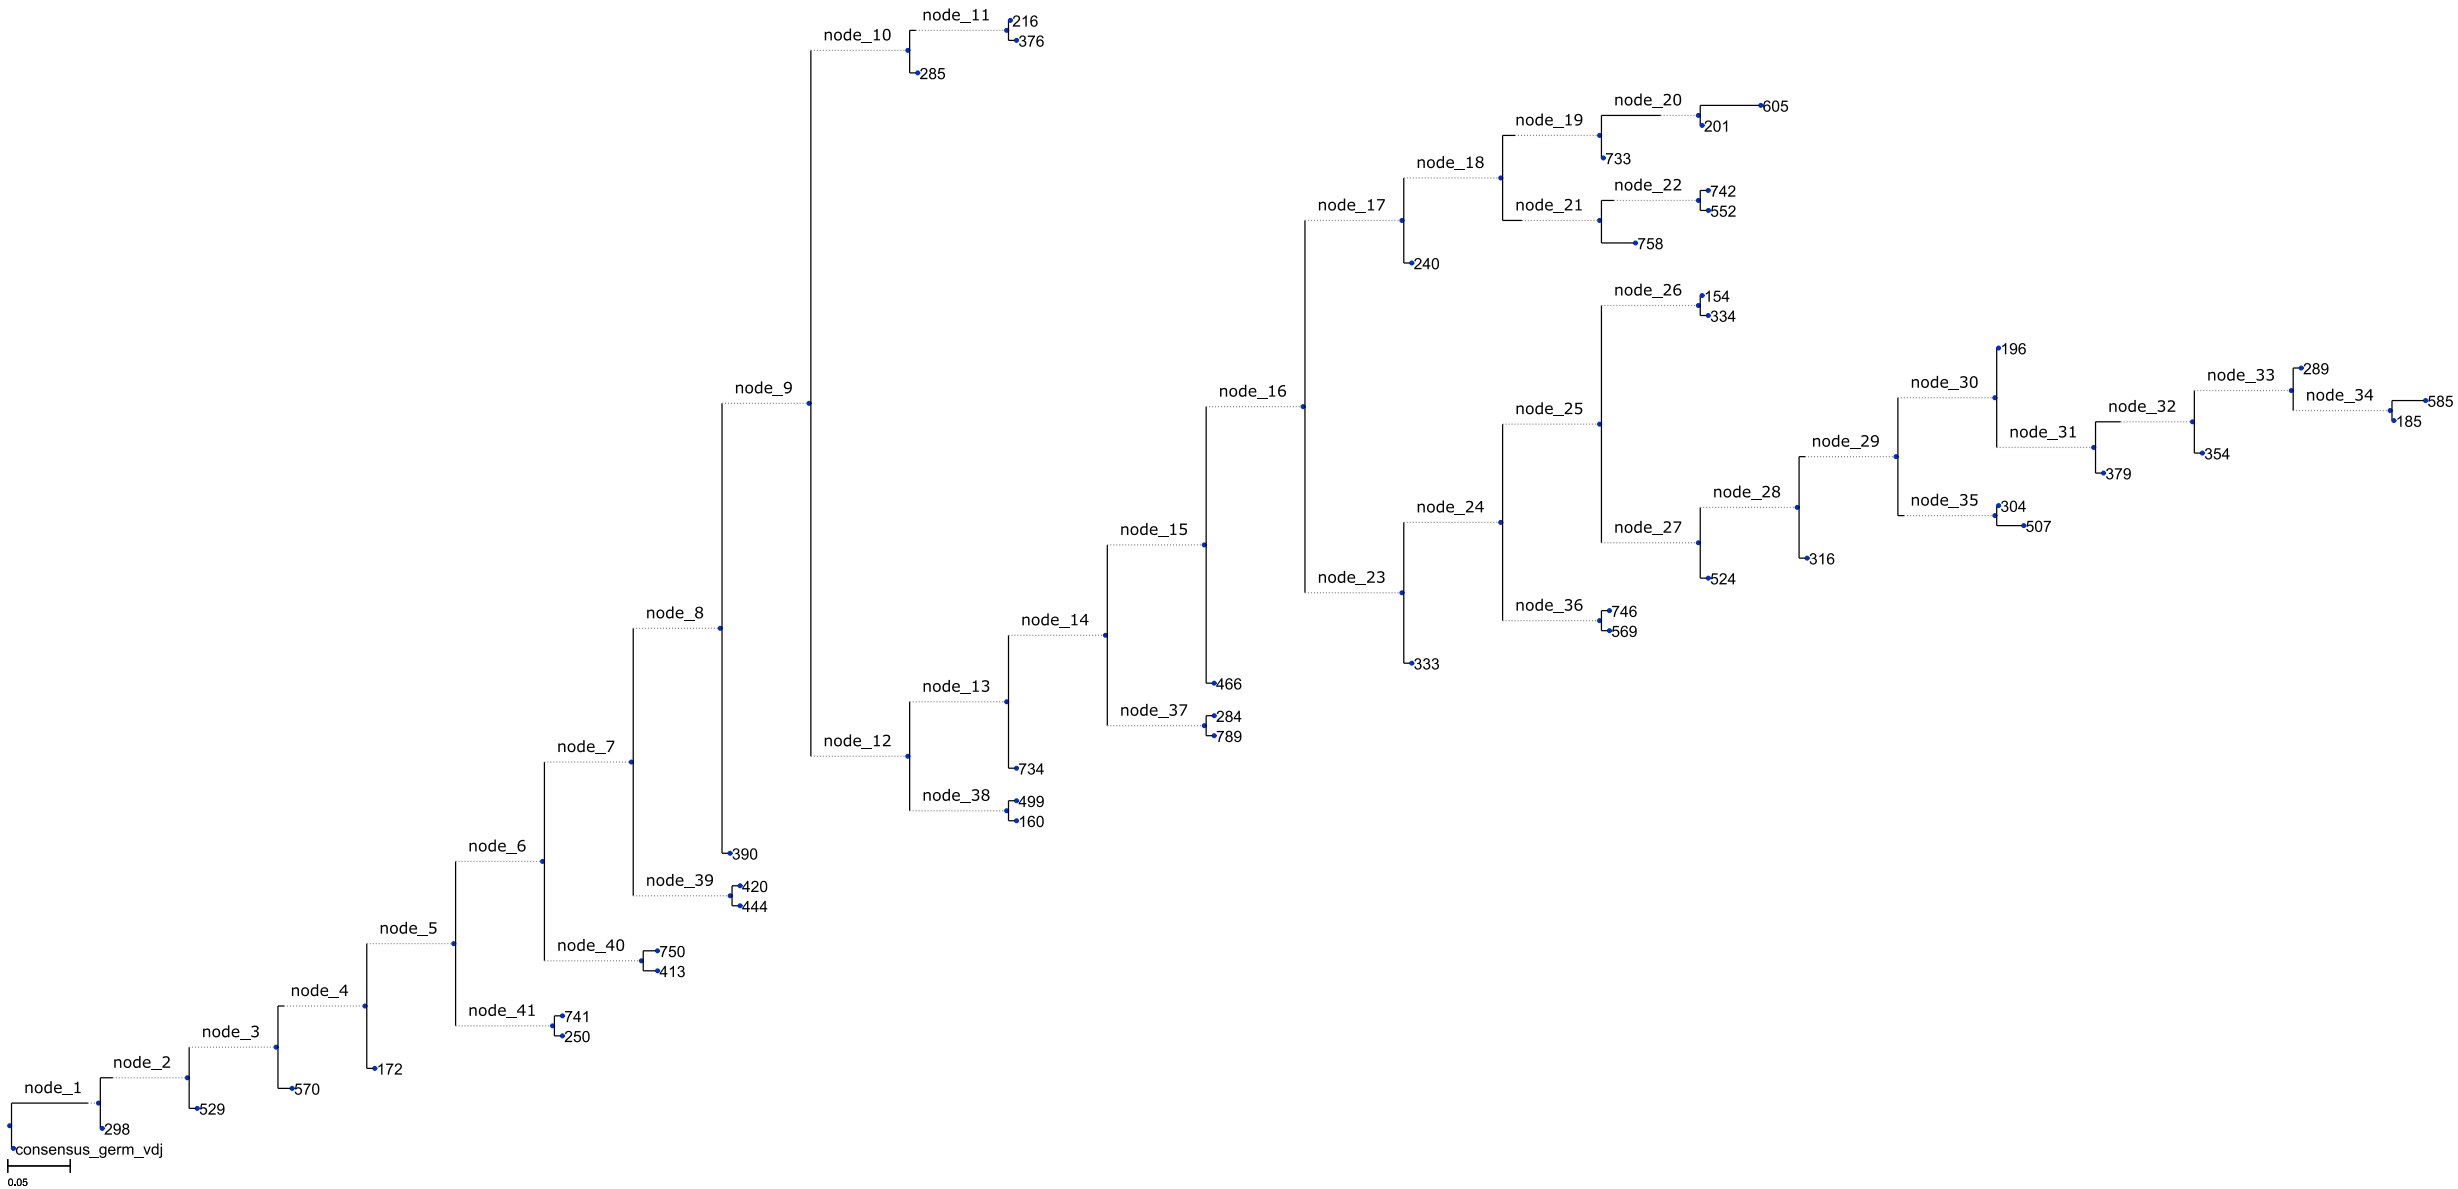

# CDR Change Analysis

|      | Conserved to Germline                   | Common to All | Variations Across Samples    |
|------|-----------------------------------------|---------------|------------------------------|
| CDR1 |                                         |               |                              |
| CDR2 | 65S                                     | 57V,58G       | 56:KPQS,64:DI                |
| CDR3 | 105A,110G,111A,112F,113D,114Y,115W,116G | 106R          | 107:EK,108:AIR,109:DY,117:EK |

Developmental lineage of the HIV bnAb CAP256-VRC26 over 8 timepoints

Amino Acid Substitutions

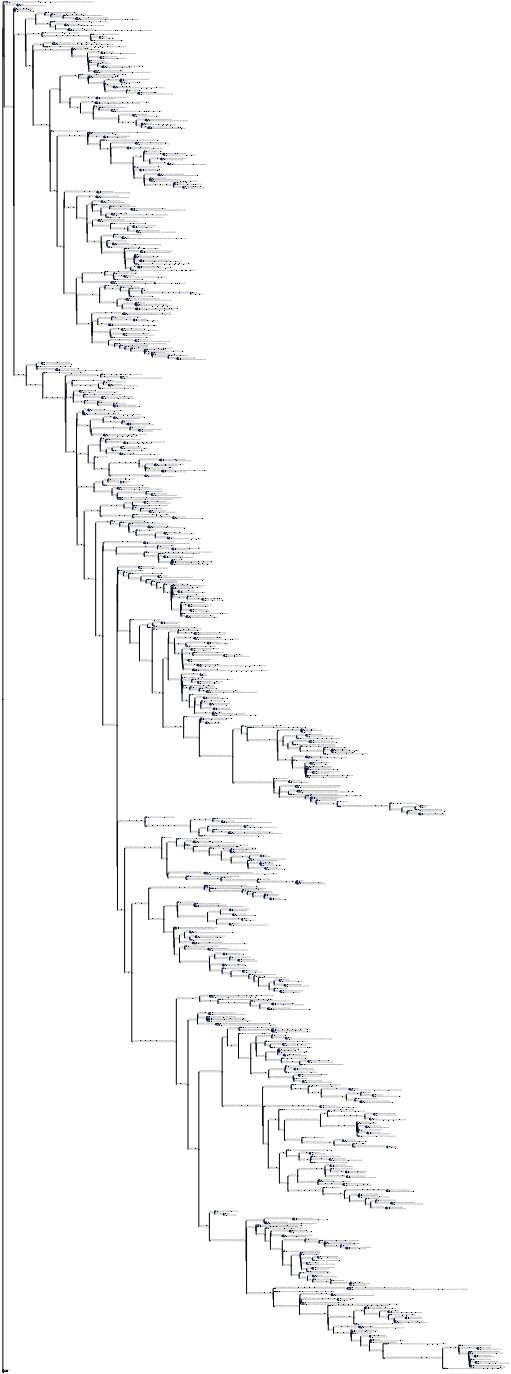

# Substitutions by Region

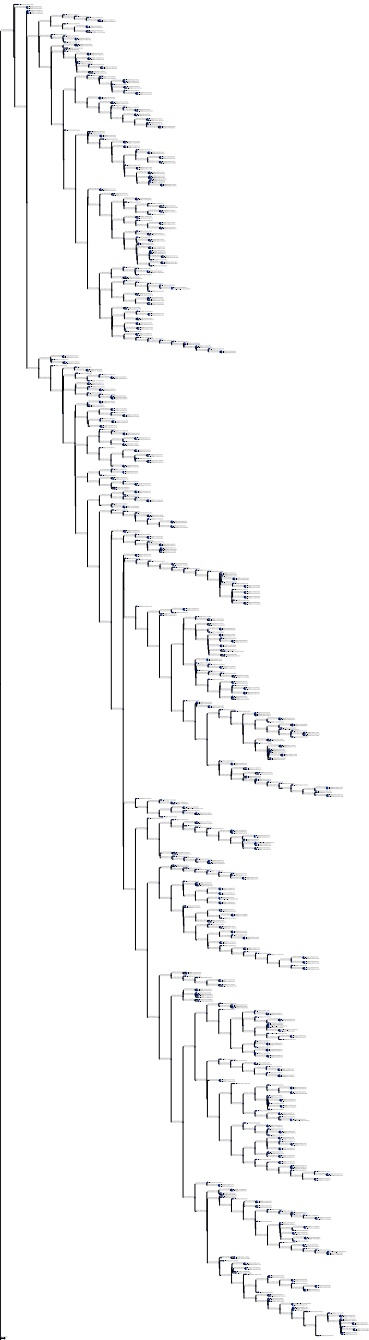

### Total Amino Acid Substitutions

Intermediate Node Names

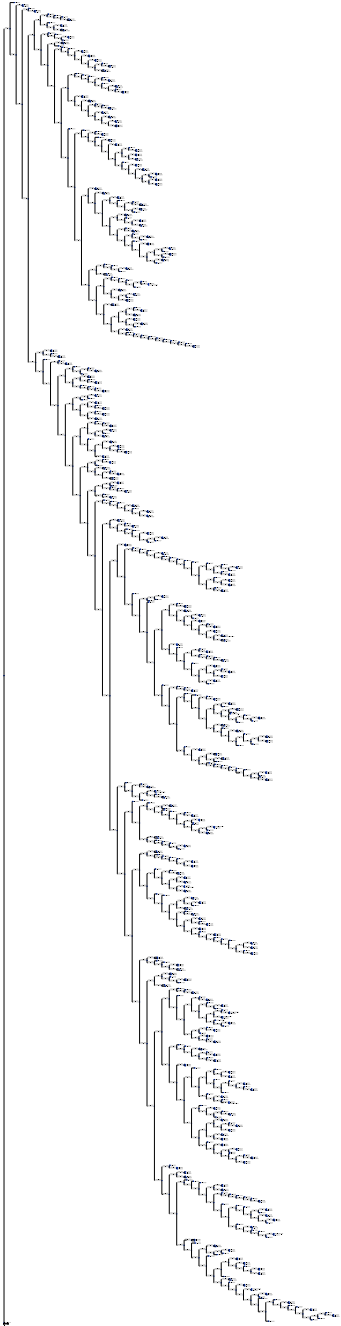

# CDR Change Analysis

|      | Conserved to Germline | Common to All | Variations Across Samples                                                                                                                                                                                                                                                                                                                                                                                                                                                        |
|------|-----------------------|---------------|----------------------------------------------------------------------------------------------------------------------------------------------------------------------------------------------------------------------------------------------------------------------------------------------------------------------------------------------------------------------------------------------------------------------------------------------------------------------------------|
| CDR1 |                       |               | 27:-ADEGHKQRVXY,28:-FILV,29:-AEGIKMNPRSTY,30:-FILSVY,35:ACDEGIKNRSTVXY,36:ADEFGHIKNPQRSTVXY,37:ACFHNSTVY,38:ACDEFGHIPSTVWXY                                                                                                                                                                                                                                                                                                                                                      |
| CDR2 |                       |               | 56:-EILMTVX,57:-AGHLNPRSTWX,58:-DFGHKLN PSTXY,59:-ADEGHNPRSV,62:-ADEGRS,63:-ADGHIKNPQRSTVXY,64:-ADEFGHIKLNQRSTXY,65:*-DEFIKMNQRSTXY                                                                                                                                                                                                                                                                                                                                              |
| CDR3 |                       | 112.11Y       | 105:ATV,106:KR,107:DE,108:AEHILMPQRSVX,109:ADGHQRX,110:ADEFGHIKLQVY,111:ADEFGHIKLMNRSTVWY,111.1:ADEKQS,111.2:CDEIKNPRSTV,111.3:-EIMVX,111.4:-D,111.5:DEGLM,111.6:AELQRTVY,111.7:RW,111.8:-AEGKPQRSTW,111.9:ALST,111.10:-P,111.11:DEHNTY,111.12:-NXY,112.10:CEY,112.9:-ADEGNSV,112.8:-FILMW,112.7:-W,112.6:-AGRSWY,112.5:-DEIKNRSTVY,112.4:-ADEGHKNPQRSVWX,112.3:-DN,112.2:ACDFGHILQRSVY,112.1:LPT,112:ACGILVY,113:AEHIKLPQRTV,114:ADEGHKNQSTV,115:AFPQRSTVWY,116:GHKPQRT,117:-GT |
